# Supplementary material for: Enhancing self-management in type 1 diabetes with wearables and deep learning
Source: PubMed Central journal article supplement (PMC9237131; doi:10.1038/s41746-022-00626-5), 2022-06-27
Supplement: 41746_2022_626_MOESM2_ESM.pdf [file 41746_2022_626_MOESM2_ESM.pdf]

# Supplementary information: Enhancing self-management in type 1 diabetes with wearables and deep learning

Taiyu Zhu\*, Chukwuma Uduku, Kezhi Li\*, Pau Herrero, Nick Oliver and Pantelis Georgiou

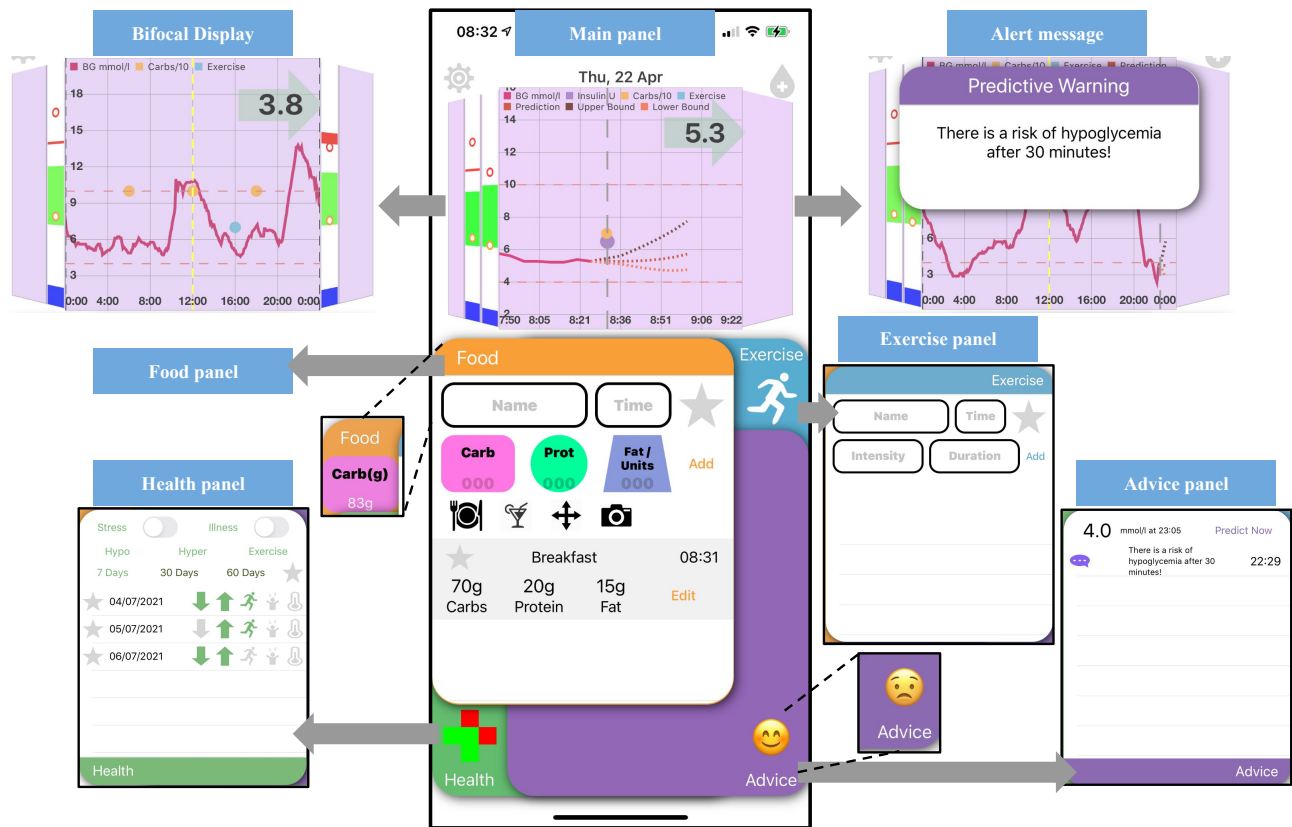

**Supplementary Figure 1: Graphical user interface of the ARISES app, where bifocal display is used to present glucose trajectories.** The users are allowed to record daily activities through the food, exercise and health panels. The embedded deep learning algorithm predicts glucose levels and detects hypo- and hyperglycemia with lower and upper bounds. Then the app sends corresponding warnings to users by notifications and haptic vibration and displays information in the advice panel. The corner icons of the food and advice panels can show the details of carbohydrate and the status of unread alert messages, respectively, when these panels are stacked at the bottom.

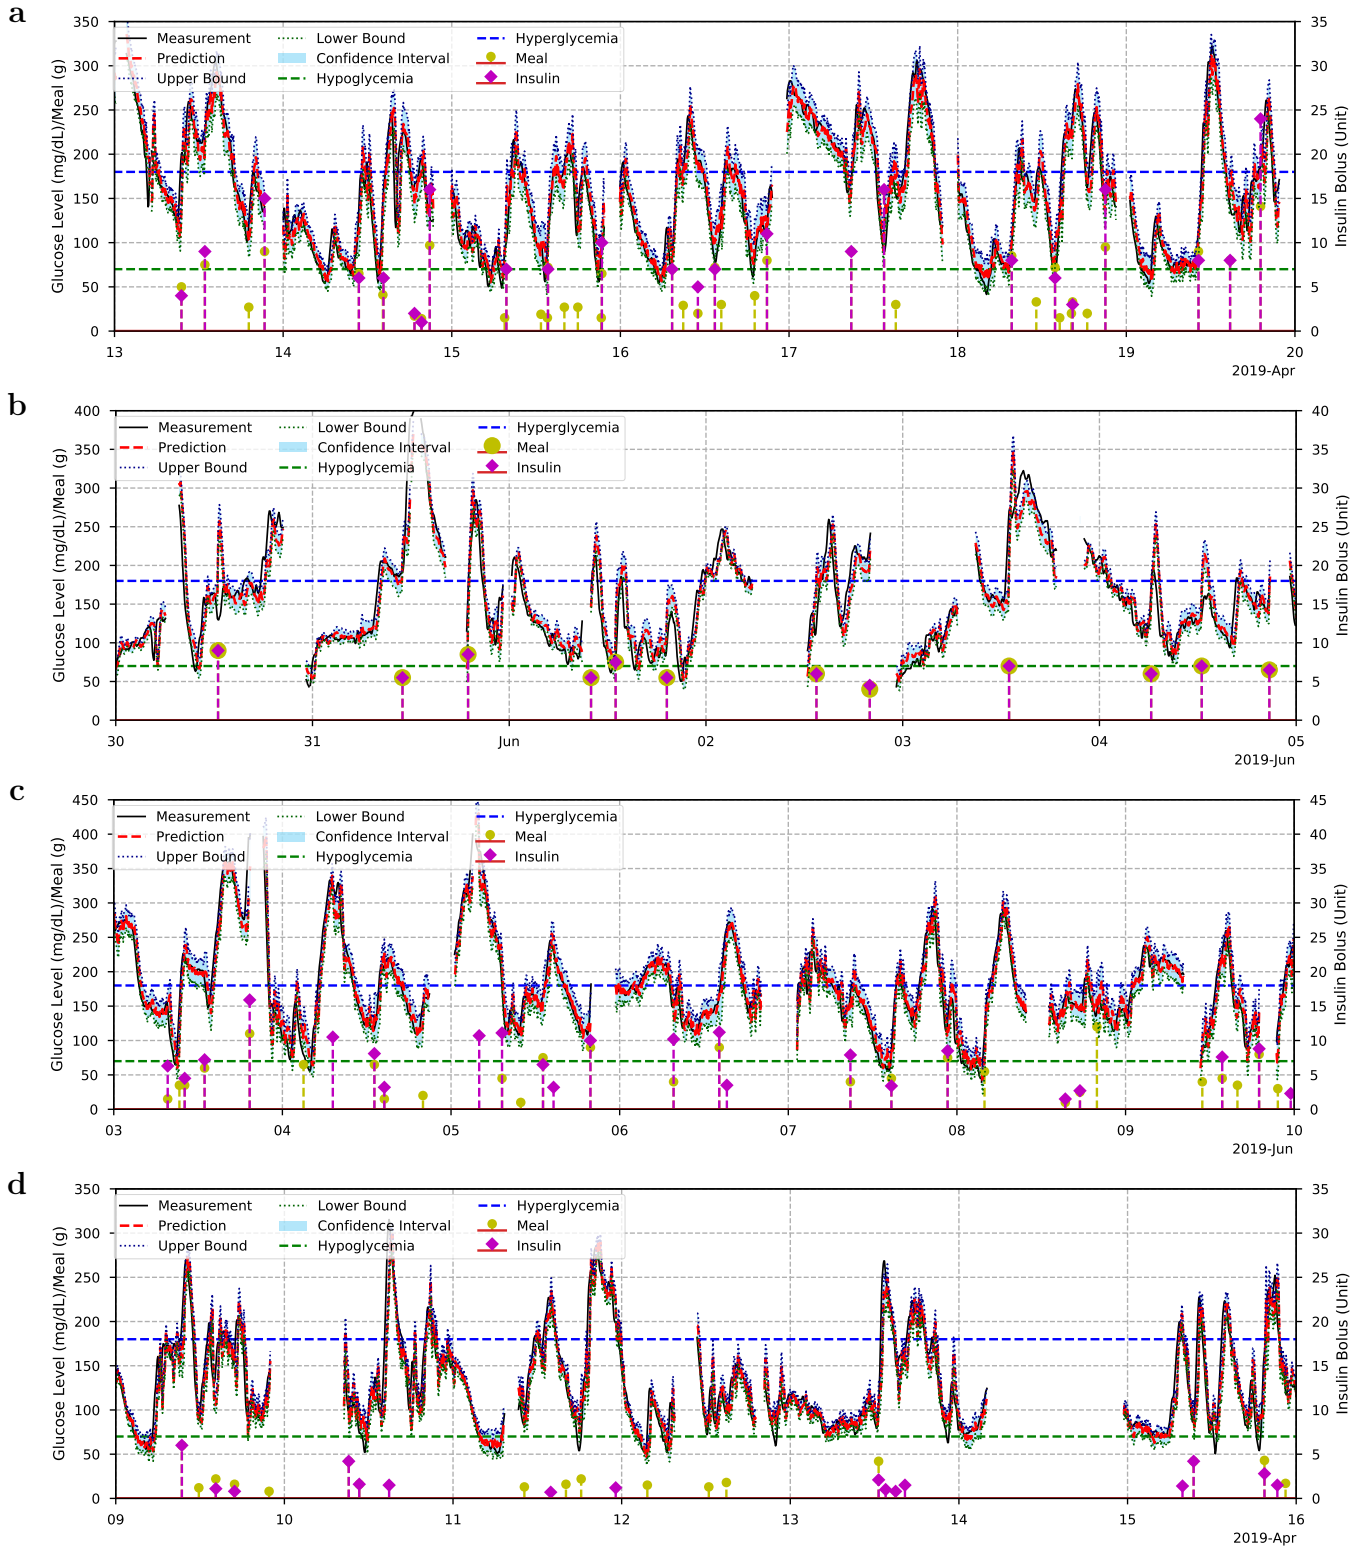

**Supplementary Figure 2: Seven-day period CGM and prediction trajectories of T1D adults over a 30-minute prediction horizon, each representing one of the four subgroups in the clinical study. a** a male participant with MDI regimen. **b** a female participant with MDI regimen. **c** a male participant with CSII regimen. **d** a female participant with CSII regimen.

**Supplementary Table 1: Number of daily entries manually recorded by the participants in the phase I of the ARISES clinical study**

| Entries       | All (n=5767) |                 | MDI (n=2988) |                   | CSII (n=2779) |                   |
|---------------|--------------|-----------------|--------------|-------------------|---------------|-------------------|
|               | % (n)        | Median (IQR)    | % (n)        | Median (IQR)      | % (n)         | Median (IQR)      |
| Carbohydrates | 39.6% (2285) | 207 (122-249.5) | 41.2% (1233) | 172 (127.5-285.5) | 37.9% (1052)  | 213 (107.5-242)   |
| Protein       | 16.9% (976)  | 132 (33-163)    | 17.5% (522)  | 42 (4-146)        | 16.3% (454)   | 158 (138-168)     |
| Fat           | 16.5% (952)  | 135 (31-163)    | 16.5% (492)  | 40 (4-146)        | 16.5% (460)   | 158 (140.5-168.5) |
| Insulin Bolus | 20.6% (1189) | 111 (57-142.5)  | 18.9% (565)  | 101 (50-131)      | 22.5% (624)   | 123 (77.5-144.5)  |
| Exercise      | 4.5% (262)   | 19.5 (13-29.5)  | 4.9% (148)   | 19.5 (13.8-28.3)  | 4.1% (114)    | 18.5 (13.5-27.3)  |
| Alcohol       | 1.2% (72)    | 6 (4-9)         | 0.5% (14)    | 2.5 (0.75-5.25)   | 2.1% (58)     | 8 (6-17)          |
| Stress        | 0.3% (18)    | 2.5 (2-3)       | 0.1% (4)     | 2 (2-2)           | 0.5% (14)     | 3 (2.5-4)         |
| Illness       | 0.3% (18)    | 3 (3-4.8)       | 0.3% (10)    | 10 (10-10)        | 0.3% (8)      | 3 (2.5-3)         |

**Supplementary Table 2: Information of daily entries manually recorded by the participants (Median (IQR)) in the phase I of the ARISES clinical study**

| Entries                          | All              | Baseline         | Endpoint       | <i>p</i> |
|----------------------------------|------------------|------------------|----------------|----------|
| Total daily carbohydrate (grams) | 160 (102-220)    | 160 (100-228)    | 145 (101-220)  | 0.77     |
| Breakfast carbohydrate (grams)   | 41 (25-60)       | 40 (26-60)       | 42 (29.3-58.8) | 0.68     |
| Lunch carbohydrate (grams)       | 45 (30-60)       | 50 (33.8-62.8)   | 40 (30-65)     | 0.14     |
| Dinner carbohydrate (grams)      | 50 (40-70)       | 50 (40-70)       | 50 (40-75)     | 0.50     |
| Daily Bolus insulin (units)      | 20 (14.8-28)     | 20.2 (15.9-28.6) | 20 (14-27.5)   | 0.29     |
| Number exercise                  | 19.5 (11.8-30.3) | 8.5 (7.8-12.3)   | 7 (2.3-8)      | 0.10     |
| Daily engagement                 | 7 (4-9)          | 7 (4.8-9)        | 6 (4-8)        | 0.08     |
| Number of interactions           | 396 (237-732.3)  | 152 (121-255.3)  | 127 (89-229.8) | 0.42     |

**Supplementary Table 3: Description of features**

| Wristband (Empatica E4) |                                                                 |
|-------------------------|-----------------------------------------------------------------|
| IBI                     | Inter-beat intervals                                            |
| meanHR                  | Mean heart rate                                                 |
| medianNNI               | Median value of normal-to-normal (NN) intervals                 |
| SDNN                    | Standard deviation of NN intervals                              |
| RMSSD                   | Root mean square of successive differences between adjacent NNs |
| CVSD                    | Coefficient of variation of successive differences              |
| CVNNI                   | Coefficient of variation of NN intervals                        |
| pNNX                    | Percentage of successive NN intervals greater than 50 ms        |
| LHR                     | Low-/high-frequency power ratio                                 |
| EDA                     | electrodermal activity                                          |
| SCL                     | Skin conductance level                                          |
| SCR                     | Skin conductance response                                       |
| ACC                     | Average 3-D acceleration                                        |
| TEMP                    | Skin temperature                                                |
| CGM (Dexcom G6)         |                                                                 |
| CGM                     | CGM measurement sequence                                        |
| timeIndex               | Normalized time sequence                                        |
| Daily entries           |                                                                 |
| Carb                    | Amount of carbohydrate intake                                   |
| IOB                     | Insulin on board                                                |
| Bolus                   | Amount of insulin bolus delivery                                |
| COB                     | Carbohydrate on board                                           |

**Supplementary Table 4: Performance of the baseline methods for glucose level prediction over the 60-minute prediction horizon**

| Methods | RMSE (mg/dL)   | gRMSE (mg/dL)   | MAE (mg/dL)    | MAPE (%)       | Time lag (min)  |
|---------|----------------|-----------------|----------------|----------------|-----------------|
| PKM     | 43.12 ± 7.53** | 51.22 ± 10.42** | 31.51 ± 5.09** | 21.95 ± 4.28** | 19.87 ± 10.26*  |
| ARMA    | 42.29 ± 7.73** | 53.44 ± 10.24** | 30.77 ± 5.43** | 21.04 ± 3.96** | 41.89 ± 13.19** |
| SVR     | 39.99 ± 7.03** | 52.03 ± 10.48** | 31.52 ± 5.93** | 24.19 ± 5.61** | 21.34 ± 11.49   |
| ANN     | 39.31 ± 6.85** | 51.88 ± 9.59**  | 29.69 ± 5.35** | 21.15 ± 4.10** | 31.88 ± 13.65** |
| Bi-LSTM | 39.32 ± 7.19** | 51.62 ± 9.92**  | 29.02 ± 5.23** | 20.21 ± 4.01** | 19.57 ± 10.71   |
| CRNN    | 37.18 ± 6.09** | 49.04 ± 8.50**  | 27.77 ± 4.89** | 19.55 ± 3.70** | 21.57 ± 11.41   |

Root mean square error (RMSE), glucose-specific RMSE (gRMSE), mean absolute error (MAE), mean absolute percent error (MAPE), and the time lag are employed as metrics. The significance is indicated as \* $p < 0.05$ , \*\* $p < 0.01$ .

**Supplementary Table 5: Performance of the baseline methods for hypoglycemia prediction over the 60-minute prediction horizon**

| Methods | Accuracy (%)   | Sensitivity (%) | Specificity (%) | Precision (%) | MCC score     | MD (mg/dL)    |
|---------|----------------|-----------------|-----------------|---------------|---------------|---------------|
| PKM     | 80.05 ± 6.29** | 82.49 ± 13.10*  | 78.75 ± 8.77**  | 36.43±12.98** | 0.45 ± 0.11*  | 40.36±15.34** |
| ARMA    | 91.89 ± 5.23   | 56.95±19.24**   | 94.87 ± 3.67    | 55.28 ± 17.38 | 0.51 ± 0.12   | 41.92±14.60** |
| SVR     | 87.20 ± 6.08   | 6.03 ± 10.16**  | 99.10 ± 1.40**  | 30.05 ± 32.98 | 0.08 ± 0.12** | 60.55±22.73** |
| ANN     | 88.01 ± 5.80   | 17.15±11.75**   | 98.39 ± 1.43**  | 61.76 ± 15.16 | 0.26 ± 0.11** | 48.18±18.05** |
| Bi-LSTM | 87.51 ± 6.65   | 19.78±12.38**   | 97.52 ± 1.92*   | 47.79 ± 20.69 | 0.25 ± 0.15** | 43.61±16.73** |
| CRNN    | 88.06 ± 5.94   | 12.54 ± 8.40**  | 99.07 ± 0.72**  | 67.70 ± 16.88 | 0.24 ± 0.11** | 45.94±19.37** |

MCC: Matthews correlation coefficient. MD: mean deviation from true glucose levels for missed predicted hypoglycemic events. The significance is indicated as \* $p < 0.05$ , \*\* $p < 0.01$ .

**Supplementary Table 6: Performance of the baseline methods for hyperglycemia prediction over the 60-minute prediction horizon**

| Methods | Accuracy (%)   | Sensitivity (%) | Specificity (%) | Precision (%)  | MCC score     | MD (mg/dL)     |
|---------|----------------|-----------------|-----------------|----------------|---------------|----------------|
| PKM     | 85.54 ± 3.13   | 91.58 ± 3.52    | 77.21 ± 4.74*   | 79.68 ± 12.49* | 0.68 ± 0.06   | 61.42±16.26**  |
| ARMA    | 85.05 ± 1.85** | 82.26 ± 7.02**  | 83.52 ± 6.27    | 84.59 ± 6.51   | 0.66 ± 0.04** | 65.36±14.47**  |
| SVR     | 84.73 ± 3.24** | 83.44 ± 15.68   | 75.59 ± 19.79   | 84.04 ± 5.22   | 0.64 ± 0.08** | 52.09 ± 10.85* |
| ANN     | 84.13 ± 2.15** | 76.24 ± 18.61*  | 82.43 ± 13.46   | 85.77 ± 4.85   | 0.62 ± 0.08** | 56.65±11.12**  |
| Bi-LSTM | 84.22 ± 3.38** | 77.03 ± 17.55*  | 83.19 ± 11.59   | 85.84 ± 4.58   | 0.63 ± 0.08** | 57.43±10.60**  |
| CRNN    | 83.97 ± 4.33** | 76.03 ± 20.07*  | 82.70 ± 14.53   | 87.28 ± 4.57   | 0.63 ± 0.09** | 53.47 ± 10.27* |

MCC: Matthews correlation coefficient. MD: mean deviation from true glucose levels for missed predicted hyperglycemic events. The significance is indicated as \* $p < 0.05$ , \*\* $p < 0.01$ .

**Supplementary Table 7: Hyperparameters used for the proposed deep learning model**

| Hyperparameter                              | Value |
|---------------------------------------------|-------|
| Hidden units of the Bidirectional GRU layer | 128   |
| Hidden units of the GRU layer               | 128   |
| Hidden units of the attention layer         | 128   |
| Learning rate of meta-learning              | 1e-4  |
| Learning rate of fine-tuning                | 1e-5  |
| Batch size                                  | 64    |
| Number of epochs                            | 500   |
| Early stopping patience                     | 50    |
| Length of sequence                          | 12    |
| Feature Dimension                           | 6     |
